# Supplementary figures and images for: Stearoyl-CoA Desaturase (SCD) Induces Cardiac Dysfunction with Cardiac Lipid Overload and Angiotensin II AT1 Receptor Protein Up-Regulation
Source: MDPI journal article supplement (doi:10.3390/ijms22189883), 2021-09-13

# Blots Figure 6

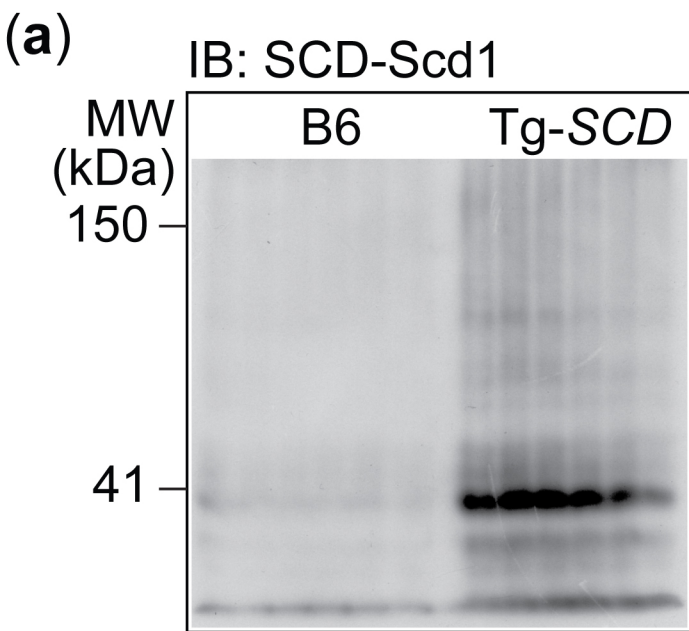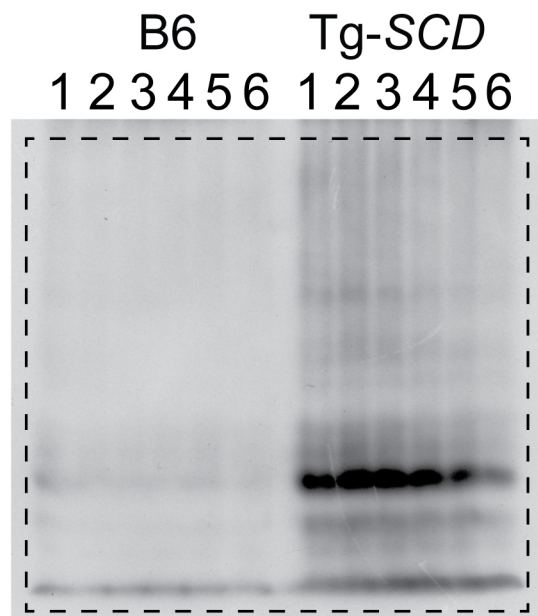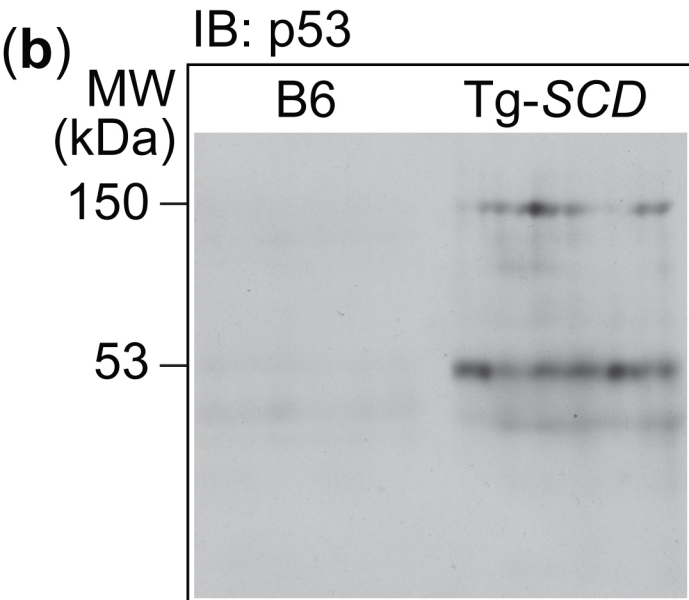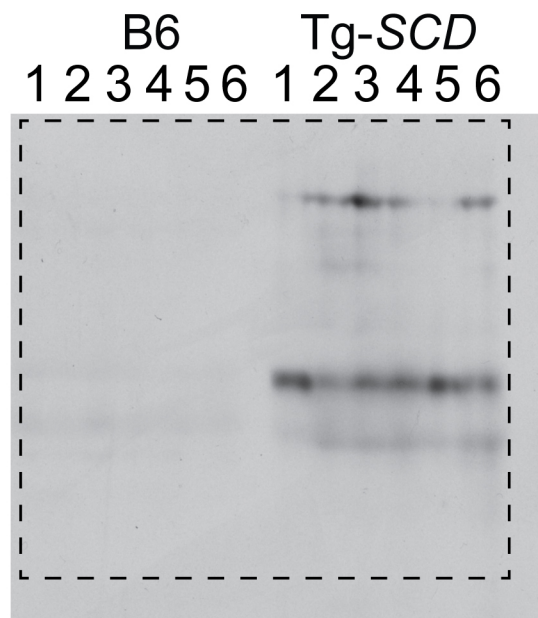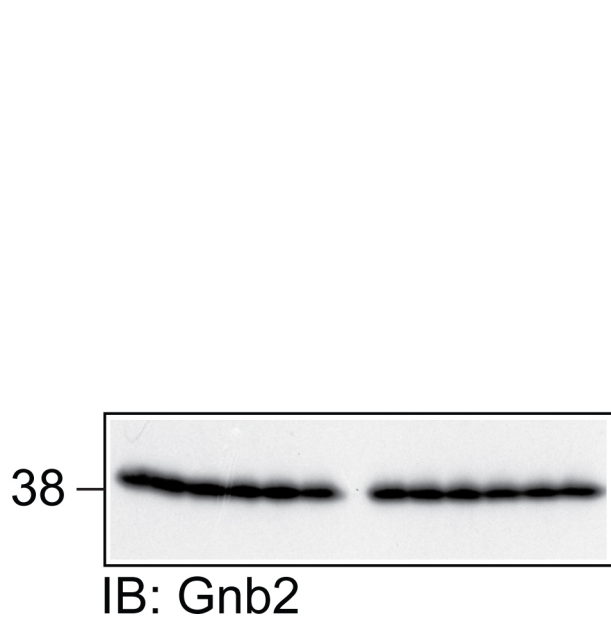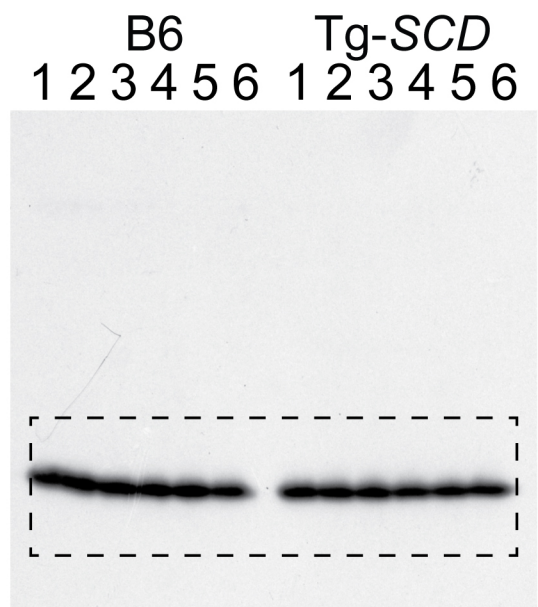

# Blots Figure 9

(a)

IB: Fasn

MW  
(kDa)  
250

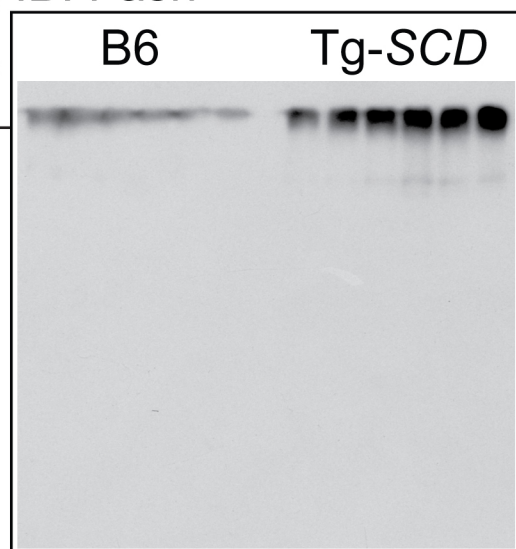

B6 Tg-SCD  
1 2 3 4 5 6 1 2 3 4 5 6

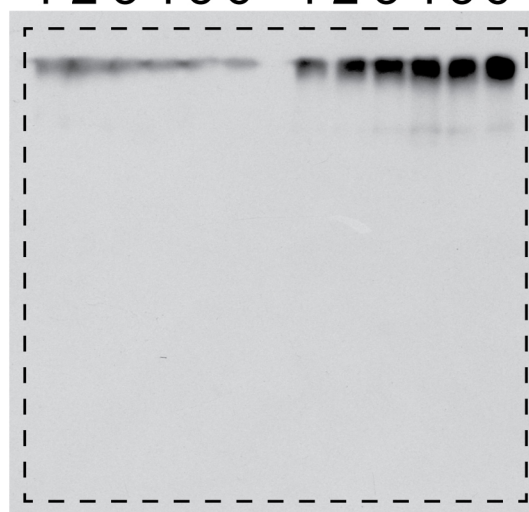

(b)

IB: Adipoq

MW  
(kDa)  
26

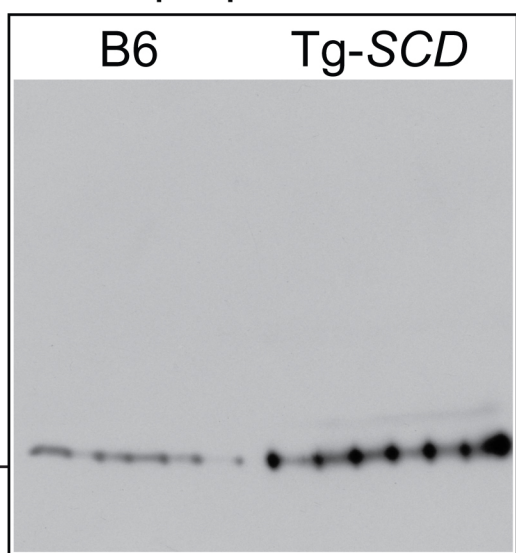

B6 Tg-SCD  
1 2 3 4 5 6 1 2 3 4 5 6

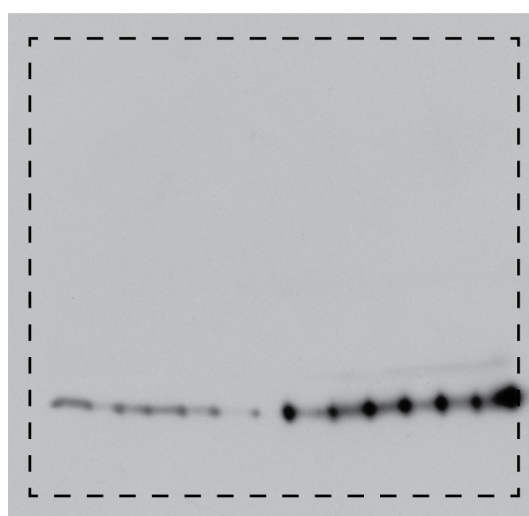

B6 Tg-SCD  
1 2 3 4 5 6 1 2 3 4 5 6

38

IB: Gnb

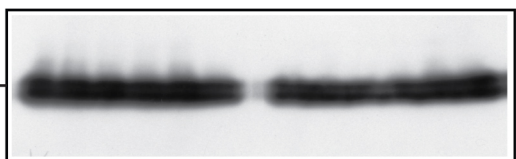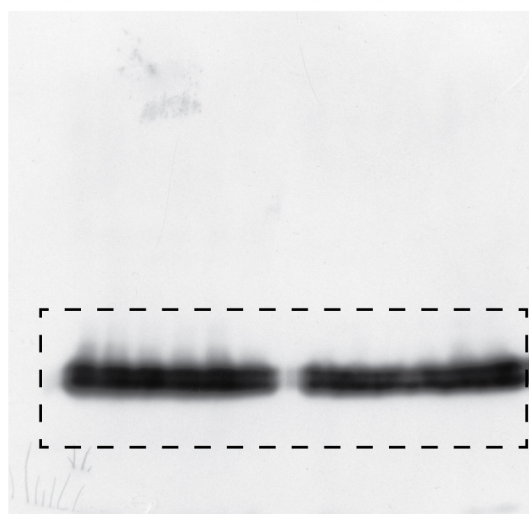

Supplement: s1 [file s1]
